# Supplementary material for: Combined piezoelectricity, valley splitting and Dzyaloshinskii–Moriya interaction in Janus GdXY (X, Y = Cl, Br, I) magnetic semiconductors
Source: Royal Society of Chemistry journal article supplement (doi:10.1039/d2cp04482j), 2023-01-01
Supplement: d2cp04482j1.pdf [file d2cp04482j1.pdf]

**supplementary material:**

**Combined piezoelectricity, valley splitting and Dzyaloshinskii-Moriya interaction in  
Janus GdXY ( $X, Y = \text{Cl, Br, I}$ ) magnetic semiconductors**

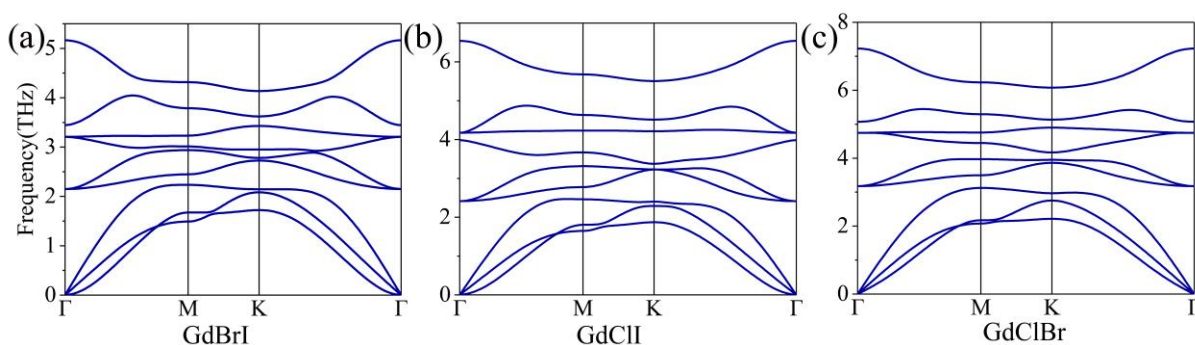

**Fig. S1.** The phonon spectrum of monolayer GdBrI (a), GdClI (b), and GdClBr (c).

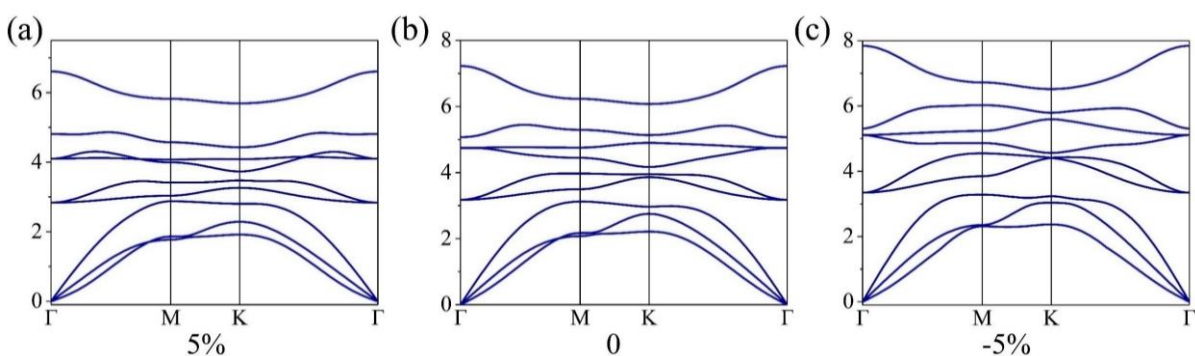

**Fig. S2.** The phonon spectrum of monolayer GdClBr with biaxial strain of -5% (a), 0% (b) and 5% (c).

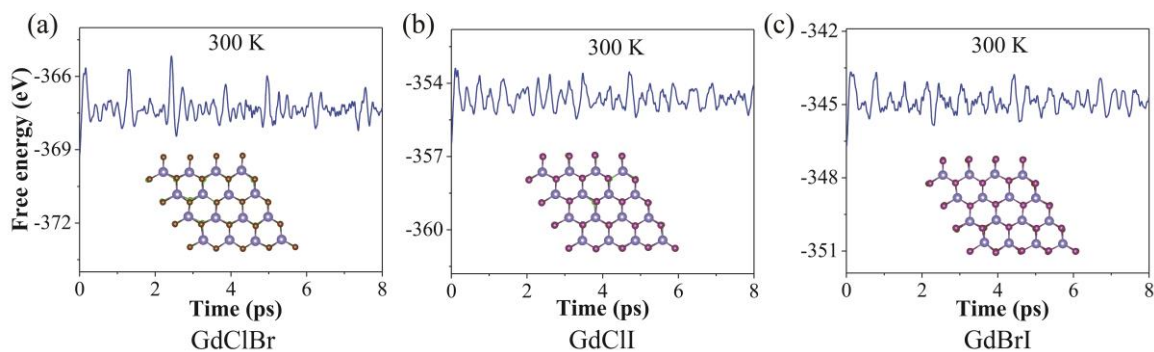

**Fig. S3.** The variation of total free energy during the 8 ps ab initio molecular dynamics simulation of monolayer GdClBr (a), GdClI (b), and GdBrI (c). The inset show the final structure after 8 ps at 300

K.

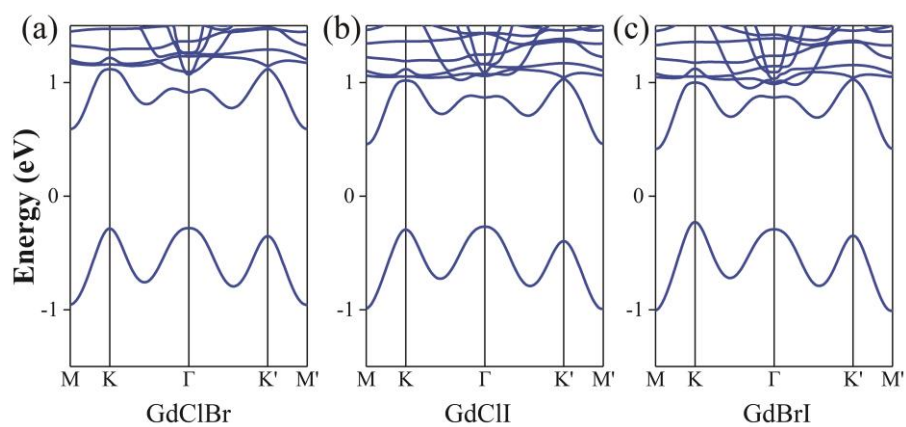

**Fig. S4.** The band structure with SOC near the Fermi level of monolayer GdClBr (a), GdClI (b), and GdBrI (c).

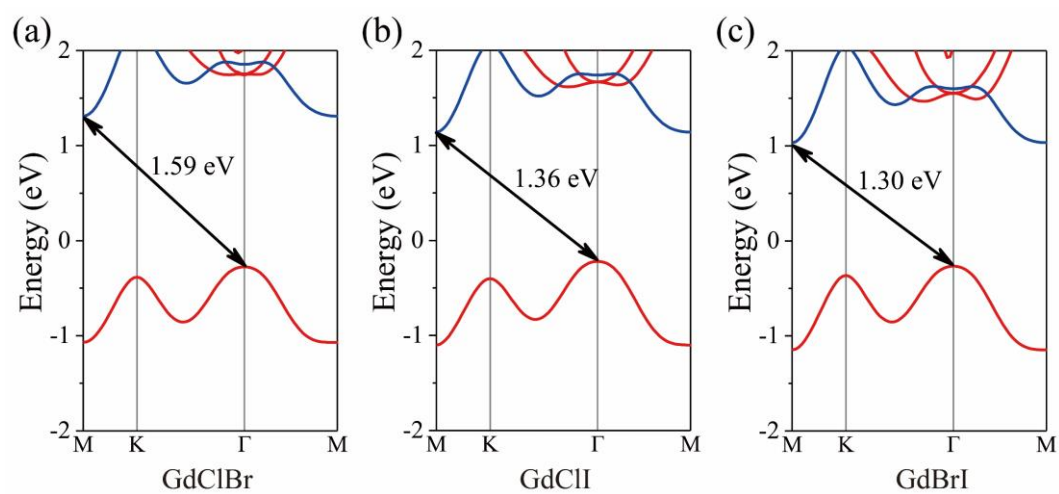

**Fig. S5.** The band structure calculated by HSE06 with hybrid functional of monolayer GdClBr (a), GdClI (b), and GdBrI (c).

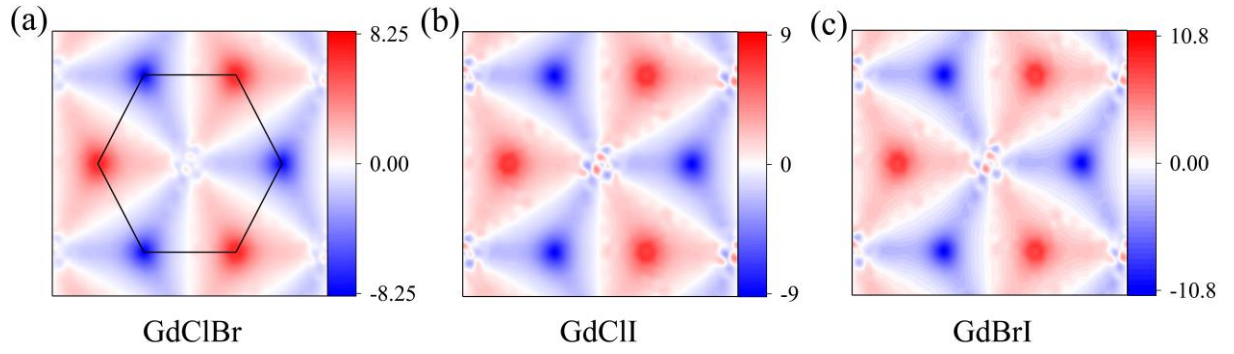

**Fig. S6.** The Berry curvatures at the top valence-band of 2D Brillouin zone of monolayer GdClBr (a), GdClI (b), and GdBrI (c).

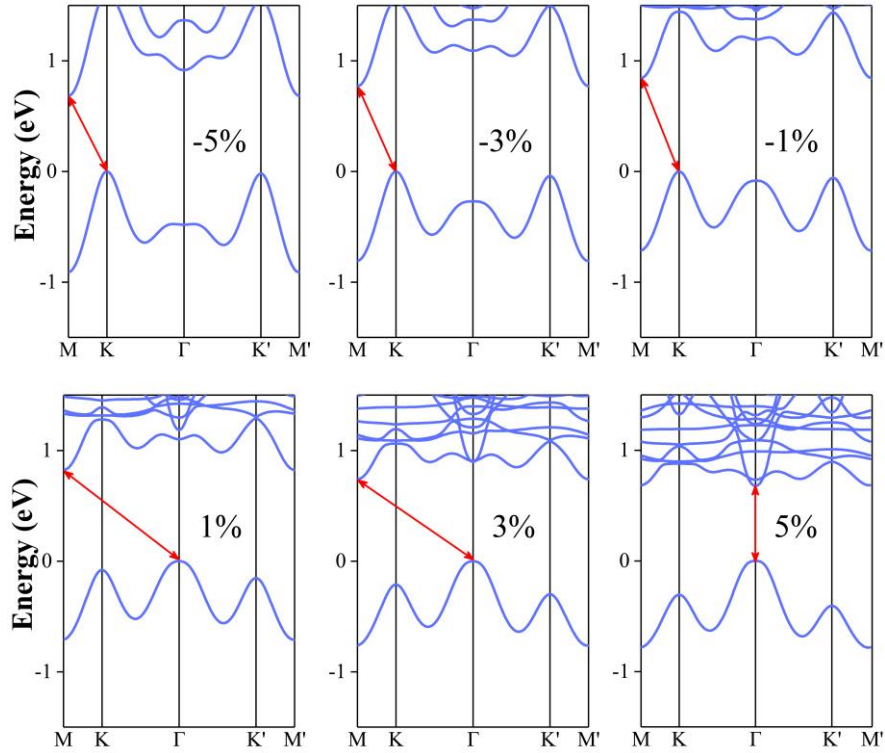

**Fig. S7.** Band structure of the monolayer GdClBr with SOC at different biaxial strains from -5% to 5%. Magnetic moments direction is along the z-axis, and the Fermi level is set at VBM. The red arrows indicate the minimum band gaps.

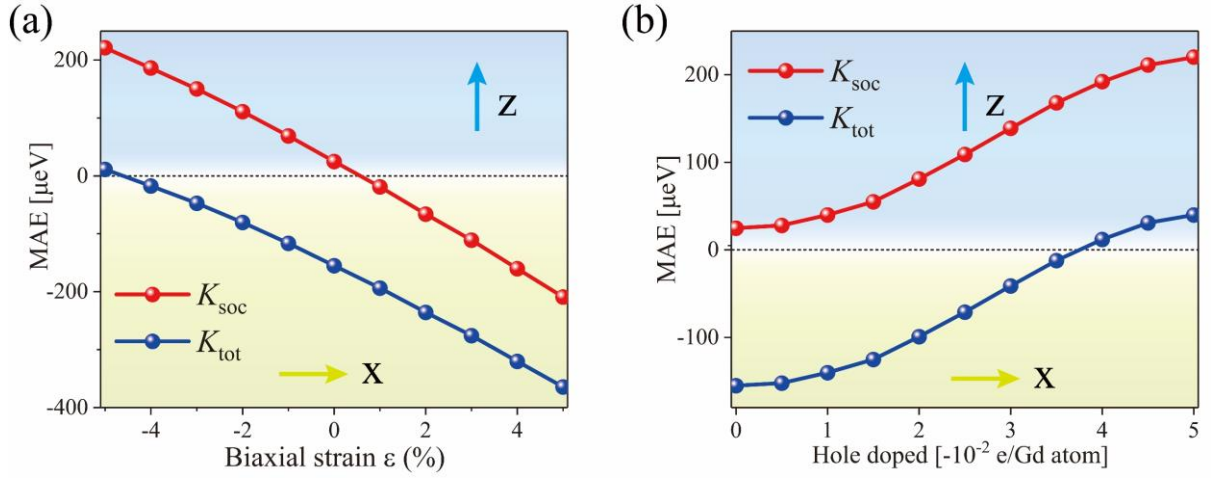

**Fig. S8.** The MAE of monolayer GdClBr varies with IP biaxial strain (a) and hole doping (b). The  $K_{\text{SOC}}$  is the single ion anisotropy arising from SOC and  $K_{\text{tot}}$  is the total single ion anisotropy containing  $K_{\text{SOC}}$  and  $K_{\text{MDD}}$  in our manuscript.

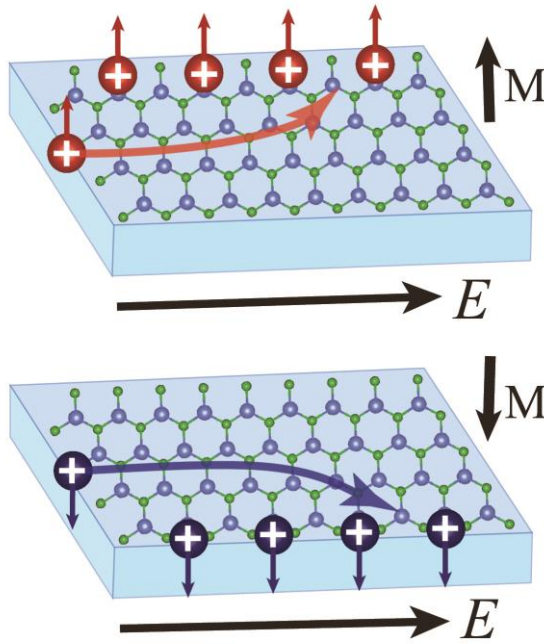

**Fig. S9.** The schematic diagram of the anomalous valley Hall effect (AVHE) of monolayer GdXY.

The black arrows denote the orientations of magnetic moments and electric field.

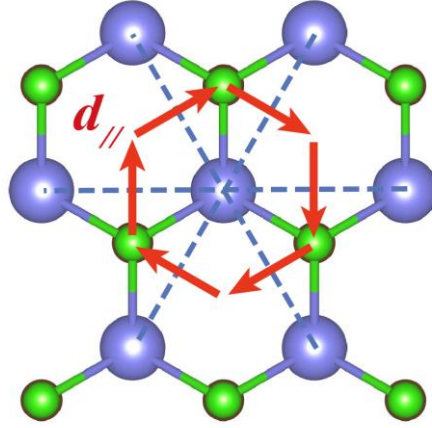

**Fig. S10.** The in-plane DMI  $d_{//}$  of monolayer GdXY.

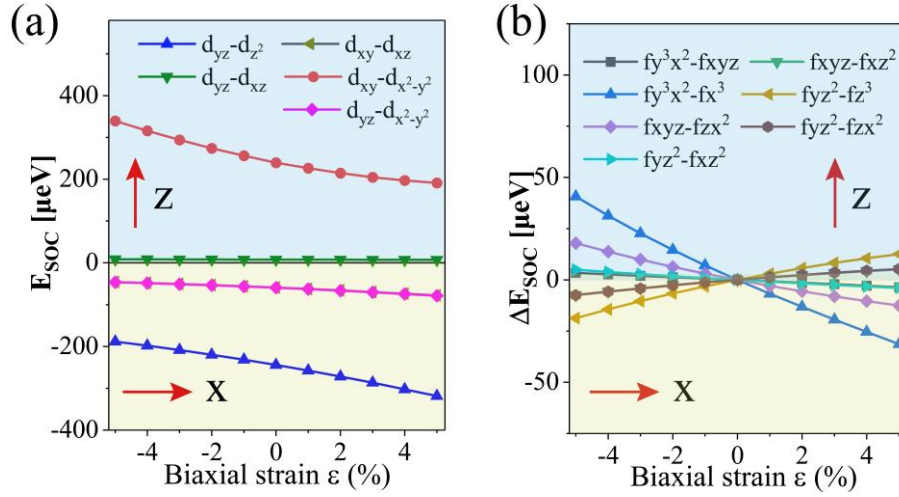

**Fig. S11.** The contribution of d-orbital coupling matrix elements of monolayer GdClBr to the  $K_{SOC}$  as a function of biaxial strain (a). The contribution of f-orbital coupling matrix elements of monolayer GdClBr to the  $K_{SOC}$  with biaxial strain compared to without strain (b).

**TABLE S1.** The number of electrons gained by the X (Y) atom,  $e_x$  ( $e_y$ ) in units of  $e/\text{atom}$ , during the formation of the Gd-X(Y) bond, and the difference between  $e_x$  and  $e_y$ ,  $\Delta e_{X-Y}$  in units of  $e/\text{atom}$ .

|  | GdClBr | GdBrI | GdClI |
|--|--------|-------|-------|
|--|--------|-------|-------|

|                  |       |       |        |
|------------------|-------|-------|--------|
| $e_x$            | 0.734 | 0.707 | 0.7595 |
| $e_y$            | 0.677 | 0.638 | 0.6225 |
| $\Delta e_{x-y}$ | 0.057 | 0.069 | 0.137  |

**TABLE S2.** The elastic constants  $C_{11}/C_{12}$  (N/m) of monolayer GdClBr with biaxial strain of -5% (a), 0(b) and 5% (c).

|          | -5%   | 0     | 5%    |
|----------|-------|-------|-------|
| $C_{11}$ | 61.98 | 44.18 | 31.89 |
| $C_{12}$ | 16.20 | 13.34 | 11.32 |
